# Supplementary material
Source: PubMed Central journal article supplement (PMC3309191)
Supplement: mmc1.pdf [file mmc1.pdf]

The American Journal of Human Genetics, Volume 90

## **Supplemental Data**

### **Germline Mutation in *ATR* in Autosomal-Dominant Oropharyngeal Cancer Syndrome**

**Akio Tanaka, Sarah Weinel, Nikoletta Nagy, Mark O'Driscoll, Joey E. Lai-Cheong, Carol L. Kulp-Shorten, Alfred Knable, Gillian Carpenter, Sheila A. Fisher, Makiko Hiragun, Yuhki Yanase, Michihiro Hide, Jeffrey Callen, and John A. McGrath**

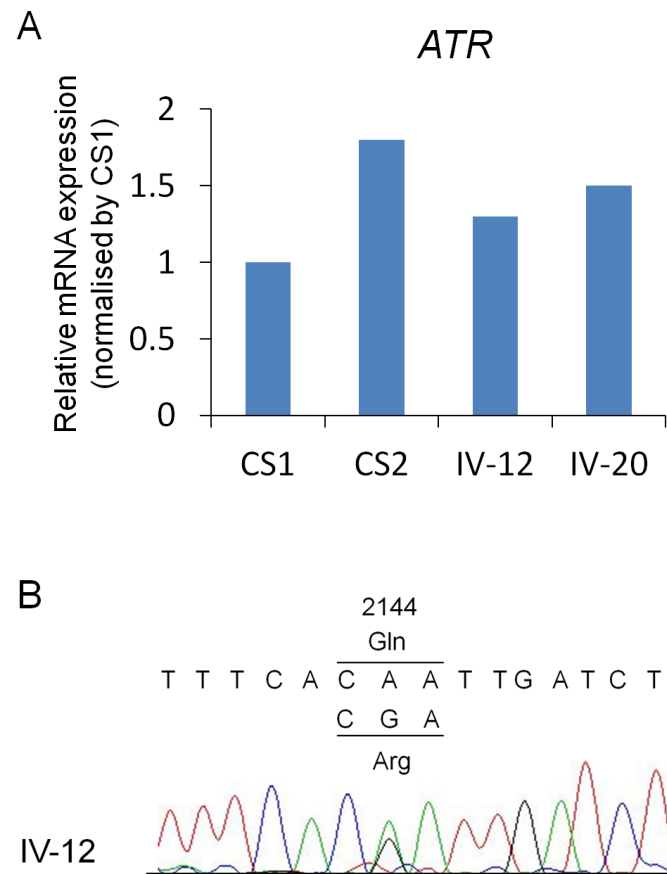

Figure S1. Quantitative Real-Time PCR Analysis and Sequence Analysis of *ATR* mRNA in the Skin Samples

(A) Relative quantification of *ATR* mRNA expression. CS1 and CS2 indicate control skin samples from two healthy donors; IV-12 and IV-20 are skin samples taken from affected individuals in Figure 1A. The gene expression was normalized against the expression of 18srRNA and expressed relative to CS1.

(B) Nucleotide sequencing of cDNA from skin mRNA in affected individual. IV-12 reveals a heterozygous missense mutation, c.6431A>G (p.Gln2144Arg) in *ATR*. This mutation was also demonstrated in the skin-derived cDNA from individuals IV-20 (data not shown).

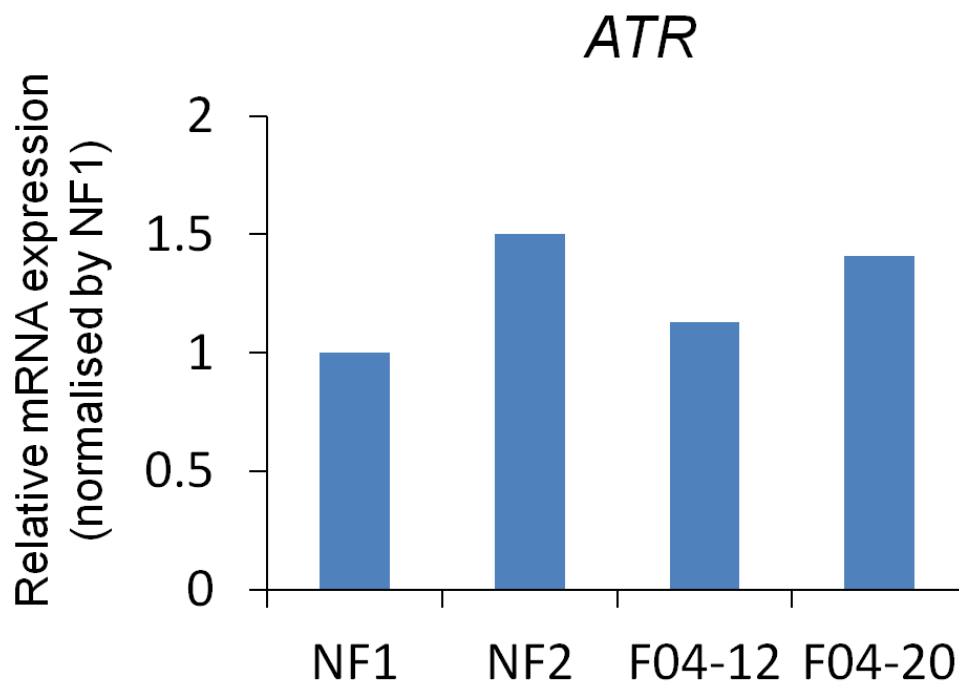

Figure S2. Relative Quantification of *ATR* mRNA Expression in Cultured Fibroblasts

NF1 and NF2 indicate control fibroblasts from two healthy donors; F04-12 and F04-20 are fibroblasts from carriers IV-12 and IV-20 in Figure 1A, respectively. The gene expression was normalized against expression of 18srRNA and expressed relative to NF1.

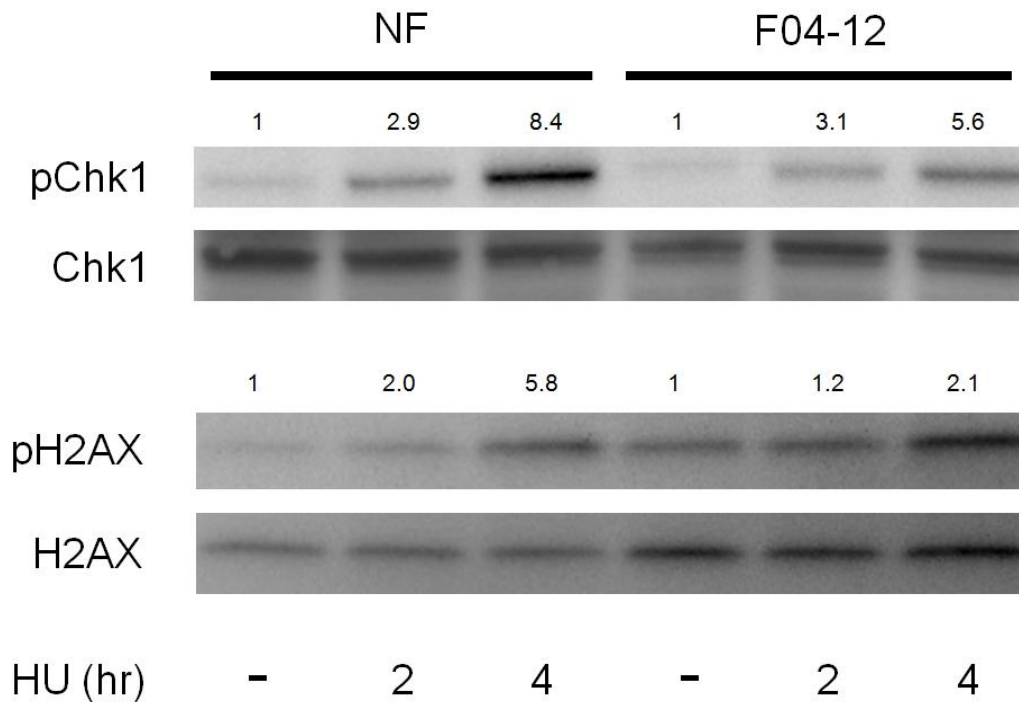

Figure S3. Western Blot for Phosphorylation of Chk1 and H2AX in Cultured Fibroblasts (Affected/Control) Pre- and Postactivation of ATR by Hydroxyurea (HU) Exposure for 2 or 4 Hours

The control fibroblasts (NF) and the affected individual fibroblasts (F04-12) show the same pattern in the phosphorylation of Chk1 and H2AX. The number immediately above each band in the western blot indicates the relative intensity of the corresponding band. The antibody for pChk1 (Ser345) (133D3) (#2348), H2AX (#2595), and phosphor-Histone H2AX (Ser139) (20E3) (#9718) were purchased from Cell Signaling; Chk1 (G-4) (sc8408) was purchased from Santa Cruz.

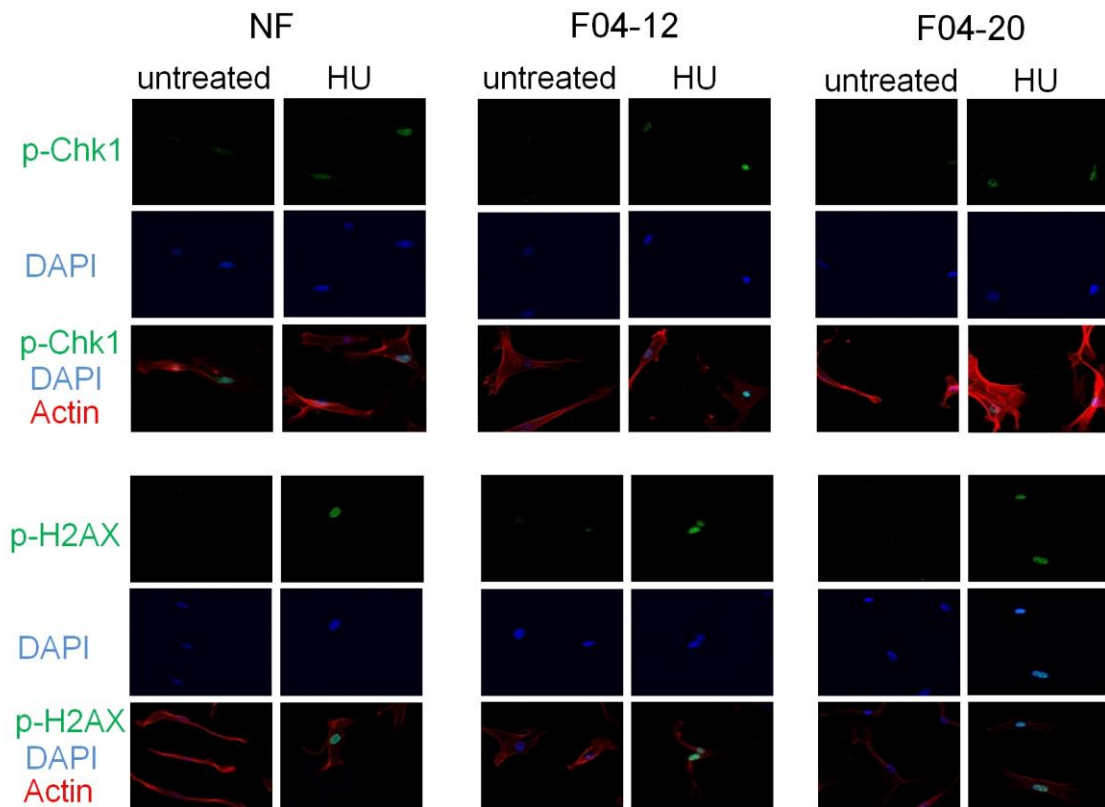

Figure S4. Immunocytochemistry for p-Chk1 and p-H2AX in Fibroblasts (Affected Individuals, F04-12 and F04-20; Unaffected Control, NF) Pre- and Postactivation of ATR by Hydroxyurea (HU) Exposure for 2 hours

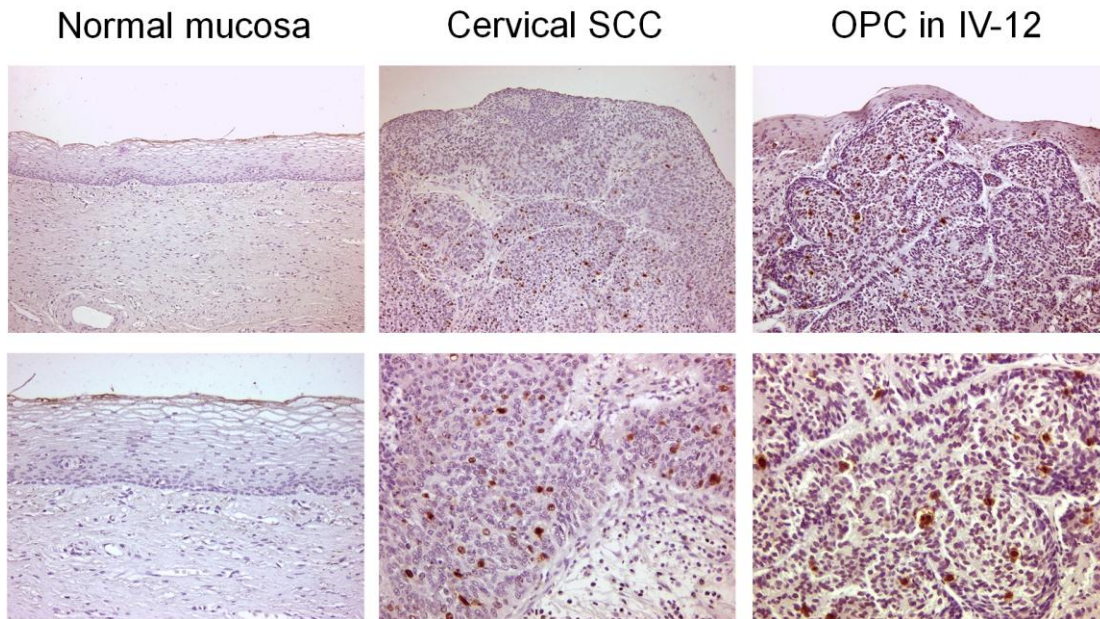

Figure S5. Immunohistochemistry for ATR in Biopsy Specimens Taken from Normal Cervical Mucosa (Normal Mucosa), Cervical Squamous Cell Carcinoma (Cervical SCC), and OPC SCC from Subject IV-12

Normal cervical mucosa does not show any ATR labeling, but some epithelial nuclei in mitotic cells in cervical SCC do show positive ATR immunoreactivity. The OPC SCC in IV-12 also shows a similar pattern to cervical SCC with some positive nuclear staining for ATR in the tumor. Upper panels: original magnification X100. Lower panels: original magnification X200. Anti-ATR antibody (ab110883) was purchased from Abcam (Cambridge, UK).

Table S1. Clinical Details of Affected Individuals with this Autosomal-Dominant Disorder

| Patient number | age, height and weight                     | Past medical history                                                                                     | Age at appearance of skin lesions | Dentition                                                                           | skin                                                                                                                                                                                              | Hair                                                           | Nails                                                                            | Other                                                                                                                  |
|----------------|--------------------------------------------|----------------------------------------------------------------------------------------------------------|-----------------------------------|-------------------------------------------------------------------------------------|---------------------------------------------------------------------------------------------------------------------------------------------------------------------------------------------------|----------------------------------------------------------------|----------------------------------------------------------------------------------|------------------------------------------------------------------------------------------------------------------------|
|                |                                            |                                                                                                          |                                   |                                                                                     |                                                                                                                                                                                                   |                                                                |                                                                                  |                                                                                                                        |
| Female III:7   | 40 years<br>5'6"<br>200lbs                 | None listed                                                                                              | DNA                               | Broken and missing teeth, several caries, thin enamel                               | Telangiectases and hyperpigmentation on the face, submentum, extremities, buttocks, and flanks                                                                                                    | Thin lateral eyebrows.<br>Alopecia in areas of telangiectases  | Mild longitudinal ridging<br>Thickened yellow toenails                           | N                                                                                                                      |
| Male III:18    | 56 years<br>5'7"<br>170lbs                 | Heart disease, Lung disease, Arthritis, Hernia repair, Gallbladder surgery, CABG, several knee surgeries | 2mos                              | Edentulous with full dentures                                                       | Telangiectases and hyper/hypo pigmentation on the face with several actinic keratoses and solar lentigens. Teleangiectasia and hyper/hypo pigmentation also present on extremities, and buttocks. | Thin lateral eyebrows.<br>Alopecia in areas of telangiectases  | Longitudinal ridging of nails<br>Onychomycosis of toenails                       | Palms and soles: Slightly thickend and rough                                                                           |
| Female IV:2    | 8.5 years<br>4'5"<br>70lbs                 | Heart murmur                                                                                             | 18mos                             | Pegged frontal incisors, thin enamel                                                | Telangiectases and hyperpigmentation on the face, extremities and flanks.                                                                                                                         | Thin lateral eyebrows.<br>Alopecia in areas of teleangiectasia | N                                                                                | N                                                                                                                      |
| Male IV:3      | 4 years<br>40.5lbs                         | None listed                                                                                              | Infancy                           | Bifid lower incisor, caries, thin enamel                                            | Telangiectases and hyperpigmentation on cheeks, extremities, ears, flanks, lateral arms, legs, and buttocks                                                                                       | Thin lateral eyebrows.<br>Alopecia in areas of telangiectases  | Pterygium left index nail<br>Dystrophic 5 <sup>th</sup> toenail left foot        | N                                                                                                                      |
| Male IV:6      | 40 years<br>5'11"<br>140lbs                | None listed                                                                                              | Unknown                           | Edentulous with full dentures                                                       | Telangiectases and hyperpigmentation on face, neck, extremities, and buttocks                                                                                                                     | Thin lateral eyebrows.<br>Alopecia in areas of telangiectases  | Longitudinal ridging, cuticular overgrowth, thumbnails appear somewhat clubbed   | Palms and soles: Xerotic palms<br>Ears: Cataracts per history<br>Facial features: Mild beak-like facies and large ears |
| Female IV:12   | 35 years<br>4'11" (short stature)<br>92lbs | Hypothyloid, Removal of tonsils and adenoids                                                             | Birth                             | Missing teeth and prominent caries                                                  | Telangiectases and hyperpigmentation on the cheeks, chin, submentum, ears, extremities, buttocks and flanks                                                                                       | Thin lateral eyebrows.<br>Alopecia in areas of telangiectases  | N                                                                                | Facial features:<br>Beak nose                                                                                          |
| Female IV:18   | 25 years<br>5'2"<br>105lbs                 | None listed                                                                                              | unknown                           | Loss of multiple teeth, several caries, yellowing and thinning of enamel            | Telangiectases on face, extremities, and buttocks                                                                                                                                                 | Thin lateral eyebrows.<br>Alopecia in areas of telangiectases  | Few longitudinal ridges                                                          | Facial features:<br>Somewhat narrowbeak nose                                                                           |
| Female IV:20   | 30 years<br>5'4"<br>120lbs                 | Kidney stones<br>Gallbladder surgery                                                                     | 6mos                              | Loss of teeth, missing mostly the molars, remaining teeth appear yellow and decayed | Telangiectases and hyperpigmentation on cheeks, extremities, buttocks, post hips, livedo on legs                                                                                                  | Thin lateral eyebrows.<br>Alopecia in areas of teleangiectasia | Unable to assess (wearing acrylics)<br>Pt reports they are thin and crack easily | N                                                                                                                      |
| Female V:1     | 9 years<br>90lbs                           | eartubes                                                                                                 | unknown                           | Multiple caries                                                                     | Telangiectases on the face, upper extremities, flanks, lower extremities and buttocks                                                                                                             | Thin lateral eyebrows.<br>Alopecia in areas of telangiectases  | N                                                                                | Eyes: Contact lenses                                                                                                   |
| Female V:2     | 6 years<br>60lbs                           | None listed                                                                                              | 1mo                               | Front incisors pegged; several dental caries noted; decreased enamel                | Telangiectases on the ears, cheeks, chin, submentum, upper chest, flanks, extremities, and buttocks                                                                                               | Thin lateral eyebrows.<br>Alopecia in areas of telangiectases  | N                                                                                | N                                                                                                                      |
| Male V:8       | 8 years<br>48lbs                           | Heart murmur, Growth hormone problems                                                                    | 2mos                              | Spacers and palatal expander in place, caries, thin enamel                          | Telangiectases on the cheeks, ears, extremities, and buttocks                                                                                                                                     | Alopecia in areas of telangiectases                            | N                                                                                | N                                                                                                                      |
| Female V:10    | 12 years<br>5'1"<br>83lbs                  | Eartubes                                                                                                 | 6mos                              | Rare cavity                                                                         | Telangiectases on the face, primarily the cheeks, extremities, buttocks and flanks                                                                                                                | Thin lateral eyebrows.<br>Alopecia in areas of telangiectasia  | Onycholysis and subungual debris left toenails                                   | N                                                                                                                      |

DNA: did not answer the question. N: no/normal.

Table S2. Cancer Surveys of Affected Individuals with this Autosomal-Dominant Disorder

| Patient number | Age       | History of smoking            | History of Alcohol             | History of cancer (age at appearance)                                                         | Site of oropharyngeal cancer                                                    |
|----------------|-----------|-------------------------------|--------------------------------|-----------------------------------------------------------------------------------------------|---------------------------------------------------------------------------------|
| Male II:2      |           | DNA                           | DNA                            | Oropharyngeal cancer (DNA)                                                                    |                                                                                 |
| Female II:6    |           | Smoker of unknown duration    | DNA                            | Oropharyngeal cancer (DNA)                                                                    |                                                                                 |
| Male II:7      |           | N                             | DNA                            | Oropharyngeal cancer (DNA)                                                                    |                                                                                 |
| Female II:12   |           | N                             | DNA                            | Oropharyngeal cancer (DNA)                                                                    |                                                                                 |
| Male III:2     |           | Cigarettes 1ppd 20+ years     | DNA                            | Oropharyngeal cancer (DNA)                                                                    |                                                                                 |
| Female III:3   |           | N                             | DNA                            | DNA                                                                                           |                                                                                 |
| Female III:7   | 40 years  | N                             | DNA                            | DNA                                                                                           |                                                                                 |
| Male III:9     |           | N                             | DNA                            | Oropharyngeal cancer (DNA)                                                                    |                                                                                 |
| Female III:12  | 63 years  | N                             | N                              | Oropharyngeal squamous cell carcinoma (63 years)<br>Squamous cell carcinoma of the skin (DNA) |                                                                                 |
| Female III:15  |           | Cigarettes 1-2ppd 30-40 years | DNA                            | Oropharyngeal cancer (DNA)                                                                    |                                                                                 |
| Male III:18    | 56 years  | N                             | DNA                            | Non-melanoma skin cancers (DNA)                                                               |                                                                                 |
| Male III:22    |           | N                             | DNA                            | DNA                                                                                           |                                                                                 |
| Female IV:2    | 8.5 years | N                             | N                              | N                                                                                             |                                                                                 |
| Male IV:3      | 4 years   | N                             | N                              | N                                                                                             |                                                                                 |
| Male IV:6      | 40 years  | Chew tobacco                  | DNA                            | N                                                                                             |                                                                                 |
| Female IV:8    | 35 years  | DNA                           | DNA                            | Breast cancer (DNA)                                                                           |                                                                                 |
| Female IV:12   | 35 years  | N                             | DNA                            | Oropharyngeal squamous cell carcinoma (34 years)<br>Non-melanoma skin cancer on the arm (DNA) | Poorly differentiated SCC of the posterior pharyngeal wall (HPV negative)       |
| Female IV:18   | 25 years  | Cigarettes 1ppd 12 years      | DNA                            | N                                                                                             |                                                                                 |
| Female IV:20   | 30 years  | Cigarettes 0.5ppd 10 years    | One glass wine per day 10years | Oropharyngeal squamous cell carcinoma (30years)<br>Cervical cancer (28years)                  | Moderately differentiated SCC of the soft palate and left tonsil (HPV negative) |
| Female V:1     | 9 years   | N                             | N                              | N                                                                                             |                                                                                 |
| Female V:2     | 6 years   | N                             | N                              | N                                                                                             |                                                                                 |
| Male V:8       | 8 years   | N                             | N                              | N                                                                                             |                                                                                 |
| Female V:10    | 12 years  | N                             | N                              | N                                                                                             |                                                                                 |

DNA: did not answer the question. N: no/normal.



Table S3. Candidate Genes Sequenced in this Study

|    | Gene symbol    | MIM number |
|----|----------------|------------|
| 1  | <i>ASTE1</i>   |            |
| 2  | <i>NEK11</i>   | 609779     |
| 3  | <i>NUDT16</i>  |            |
| 4  | <i>MRPL3</i>   | 607118     |
| 5  | <i>CPNE4</i>   | 604208     |
| 6  | <i>ACPP</i>    | 171790     |
| 7  | <i>CCRL1</i>   | 606065     |
| 8  | <i>CDV3</i>    |            |
| 9  | <i>TOPBP1</i>  | 607760     |
| 10 | <i>SRPRB</i>   |            |
| 11 | <i>RAB6A</i>   | 179513     |
| 12 | <i>SLCO2A1</i> | 601460     |
| 13 | <i>RYK</i>     | 600524     |
| 14 | <i>AMOTL2</i>  |            |
| 15 | <i>ANAPC13</i> |            |
| 16 | <i>CEP63</i>   |            |
| 17 | <i>EPHB1</i>   | 600600     |
| 18 | <i>PPP2R3A</i> | 604944     |
| 19 | <i>PCCB</i>    | 232050     |
| 20 | <i>STAG1</i>   | 604358     |
| 21 | <i>TMEM22</i>  |            |
| 22 | <i>NCK1</i>    | 600508     |
| 23 | <i>CLDN18</i>  | 609210     |
| 24 | <i>DZIP1L</i>  |            |
| 25 | <i>DBR1</i>    | 607024     |
| 26 | <i>MRAS</i>    | 608435     |
| 27 | <i>CEP70</i>   | 614310     |
| 28 | <i>FAIM</i>    |            |
| 29 | <i>PIK3CB</i>  | 602925     |
| 30 | <i>RBP2</i>    | 180280     |
| 31 | <i>RBP1</i>    | 180260     |
| 32 | <i>NMNAT3</i>  | 608702     |
| 33 | <i>RASA2</i>   | 601589     |
| 34 | <i>RNF7</i>    | 603863     |
| 35 | <i>TFDP2</i>   | 602160     |
| 36 | <i>XRN1</i>    | 607994     |
| 37 | <i>ATR</i>     | 601215     |
| 38 | <i>PLS1</i>    | 602734     |
| 39 | <i>CHST2</i>   | 603798     |
| 40 | <i>PLSCR2</i>  |            |
| 41 | <i>ZIC4</i>    | 608948     |
| 42 | <i>ZIC1</i>    | 600470     |
